# Supplementary material for: The time-course of cancer cachexia onset reveals biphasic transcriptional disruptions in female skeletal muscle distinct from males
Source: PubMed Central journal article supplement (PMC10318789; doi:10.1186/s12864-023-09462-7), 2023-07-04

**a**

**Upregulated Pathways Unique to Females**

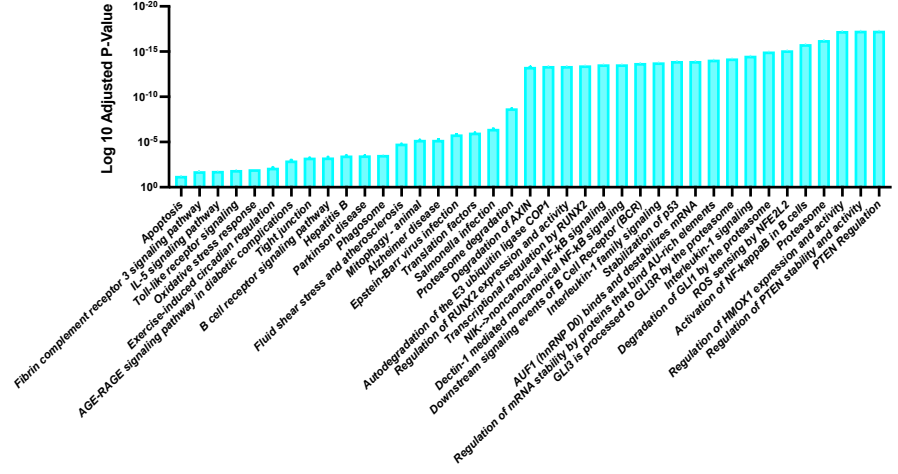

**b**

**Upregulated Pathways Unique to Males**

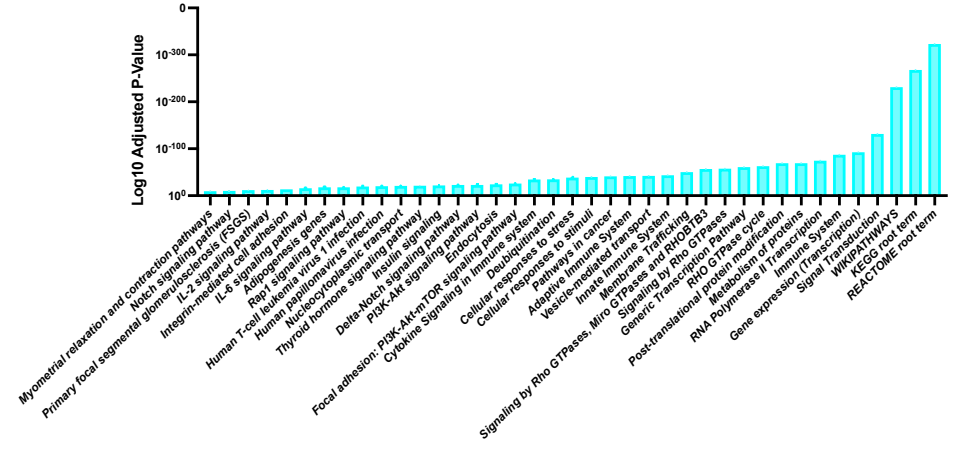

**Downregulated Pathways Unique to Females**

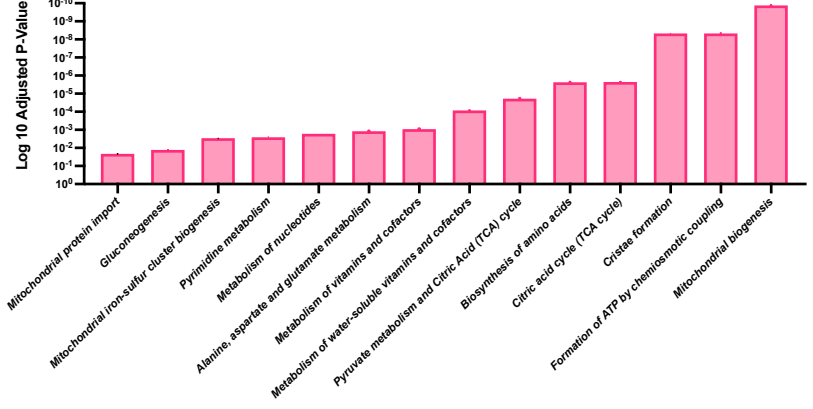

**Downregulated Pathways Unique to Male**

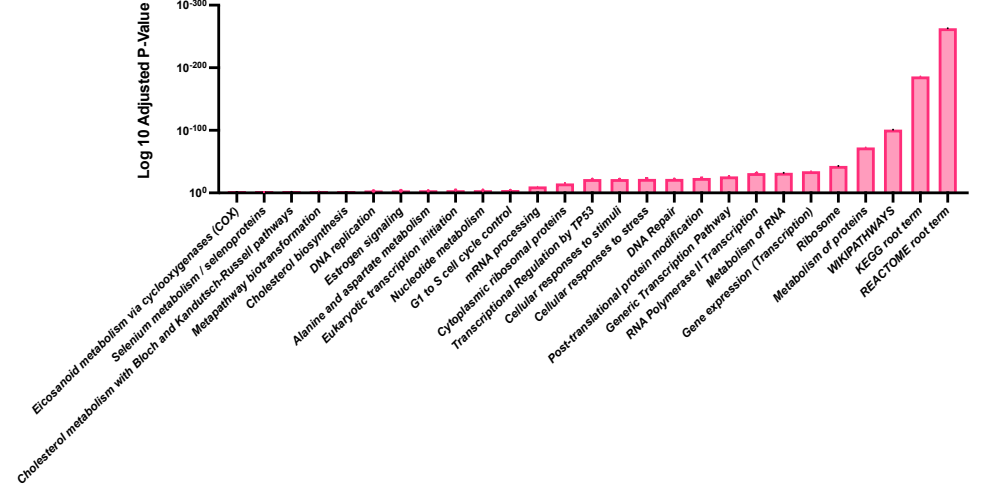

Supplement: 12864_2023_9462_MOESM1_ESM.pdf [file 12864_2023_9462_MOESM1_ESM.pdf]
